# Supplementary material for: Impact of biomass burning and stratospheric intrusions in the remote South Pacific Ocean troposphere
Source: Copernicus journal article supplement (doi:10.5194/acp-22-4075-2022), 2022-03-29
Supplement: Supplementary file 1 [file acp-22-4075-2022-supplement.pdf]

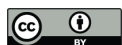

*Supplement of*

## **Impact of biomass burning and stratospheric intrusions in the remote South Pacific Ocean troposphere**

**Nikos Daskalakis et al.**

*Correspondence to:* Nikos Daskalakis ([daskalakis@uni-bremen.de](mailto:daskalakis@uni-bremen.de))

The copyright of individual parts of the supplement might differ from the article licence.

*Supplementary material*

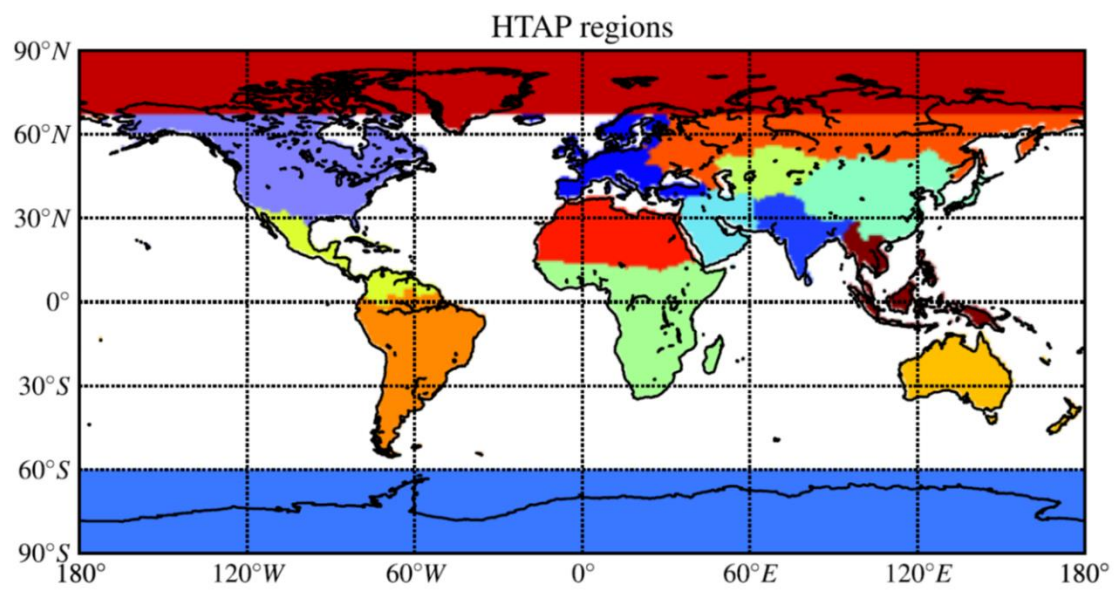

Figure S1: HTAP emissions source regions.

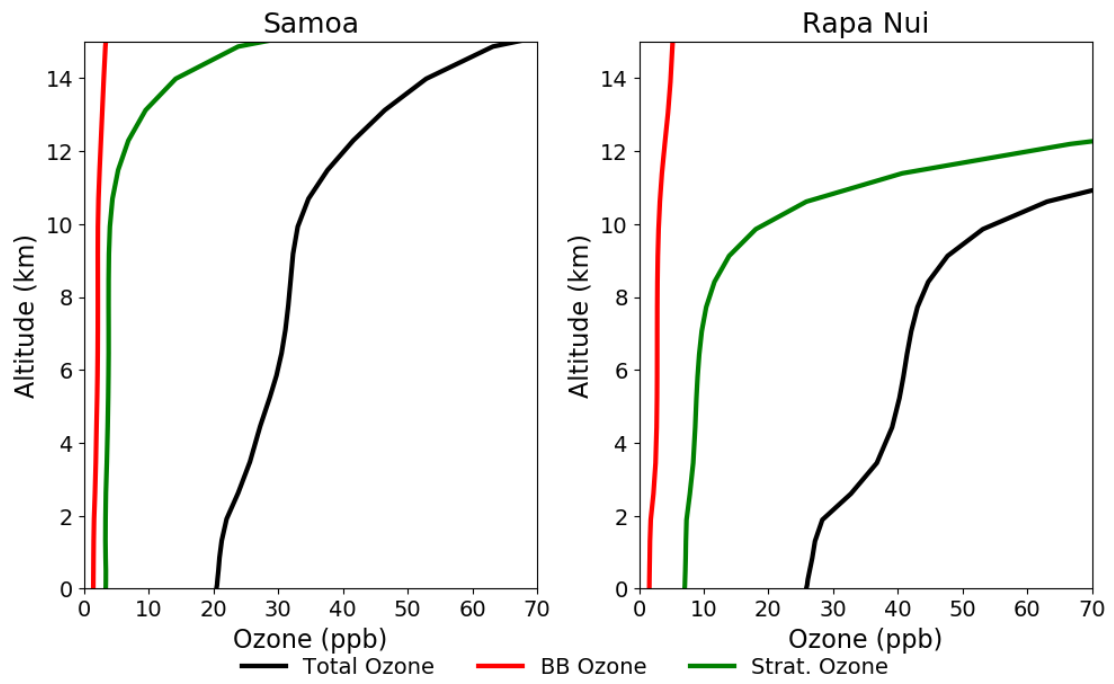

Figure S2: Vertical distribution of O<sub>3</sub> at Samoa (right) and Rapa Nui (left). Total O<sub>3</sub> is with black, O<sub>3</sub> originating from the stratosphere is in green and O<sub>3</sub> due to biomass burning is in red.
